# Supplementary figures and images for: Jorunnamycin A Suppresses Stem-Like Phenotypes and Sensitizes Cisplatin-Induced Apoptosis in Cancer Stem-Like Cell-Enriched Spheroids of Human Lung Cancer Cells
Source: MDPI journal article supplement (doi:10.3390/md19050261), 2021-05-03

A)

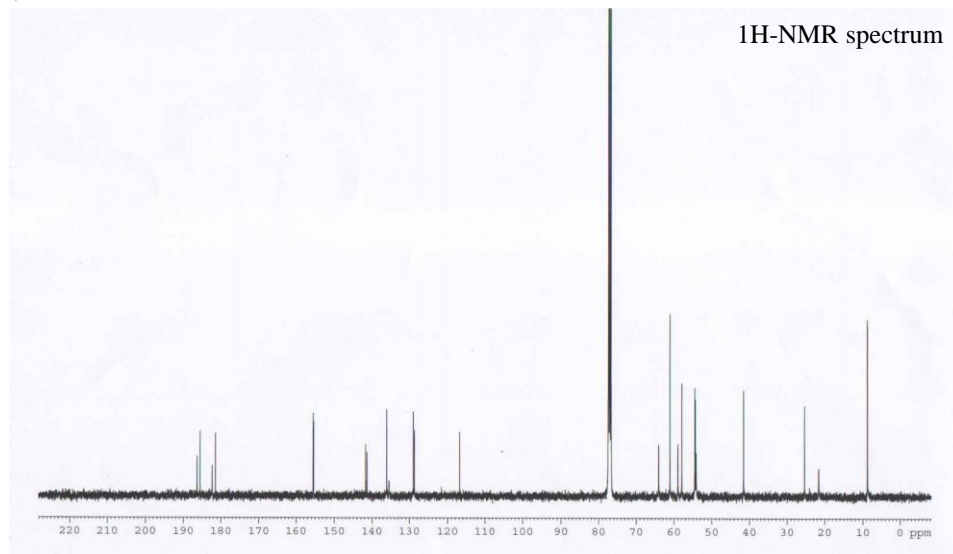

B)

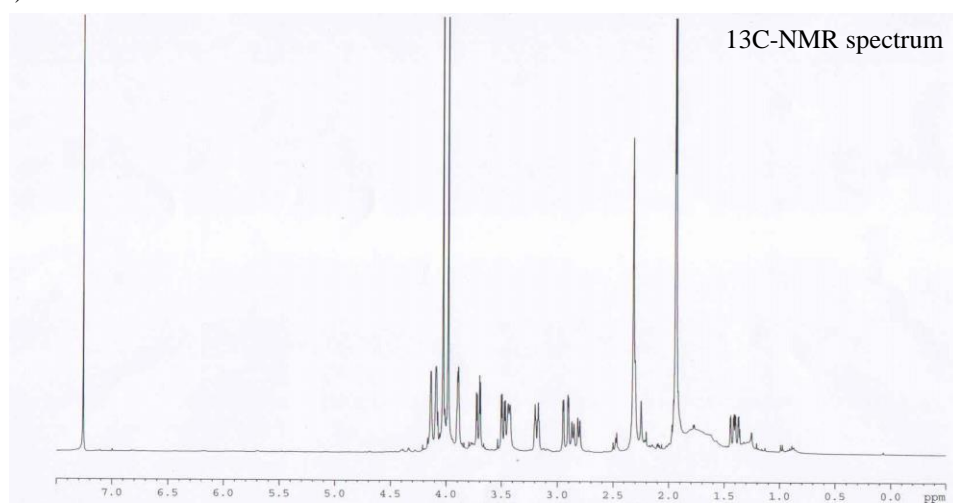

Figure S1. NMR spectrum of jorunnamycin A.

Supplement: s1 [file s1]
